# Supplementary material for: ATAC-seq on biobanked specimens defines a unique chromatin accessibility structure in naïve SLE B cells
Source: Sci Rep. 2016 Jun 1;6:27030. doi: 10.1038/srep27030 (PMC4888756; doi:10.1038/srep27030)
Supplement: Supplementary Information [file srep27030-s1.pdf]

# **ATAC-seq on biobanked specimens defines a unique chromatin accessibility structure in naïve SLE B cells**

Christopher D. Scharer<sup>1,+</sup>, Emily L. Blalock<sup>2,+</sup>, Benjamin G. Barwick<sup>1</sup>, Robert R. Haines<sup>1</sup>, Chungwen Wei<sup>2</sup>, Ignacio Sanz<sup>2</sup>, and Jeremy M. Boss<sup>1,\*</sup>

<sup>1</sup>Department of Microbiology and Immunology, Emory University School of Medicine, Atlanta, GA

<sup>2</sup>Department of Rheumatology, Emory University School of Medicine, Atlanta, GA

\*jmboss@emory.edu

<sup>+</sup>These authors contributed equally to this work

**Supplementary Table S1.** ATAC-seq peaks identified in fresh and biobanked samples.

**Supplementary Table S2.** ATAC-seq peaks significantly differentially accessible between HC and SLE subjects.

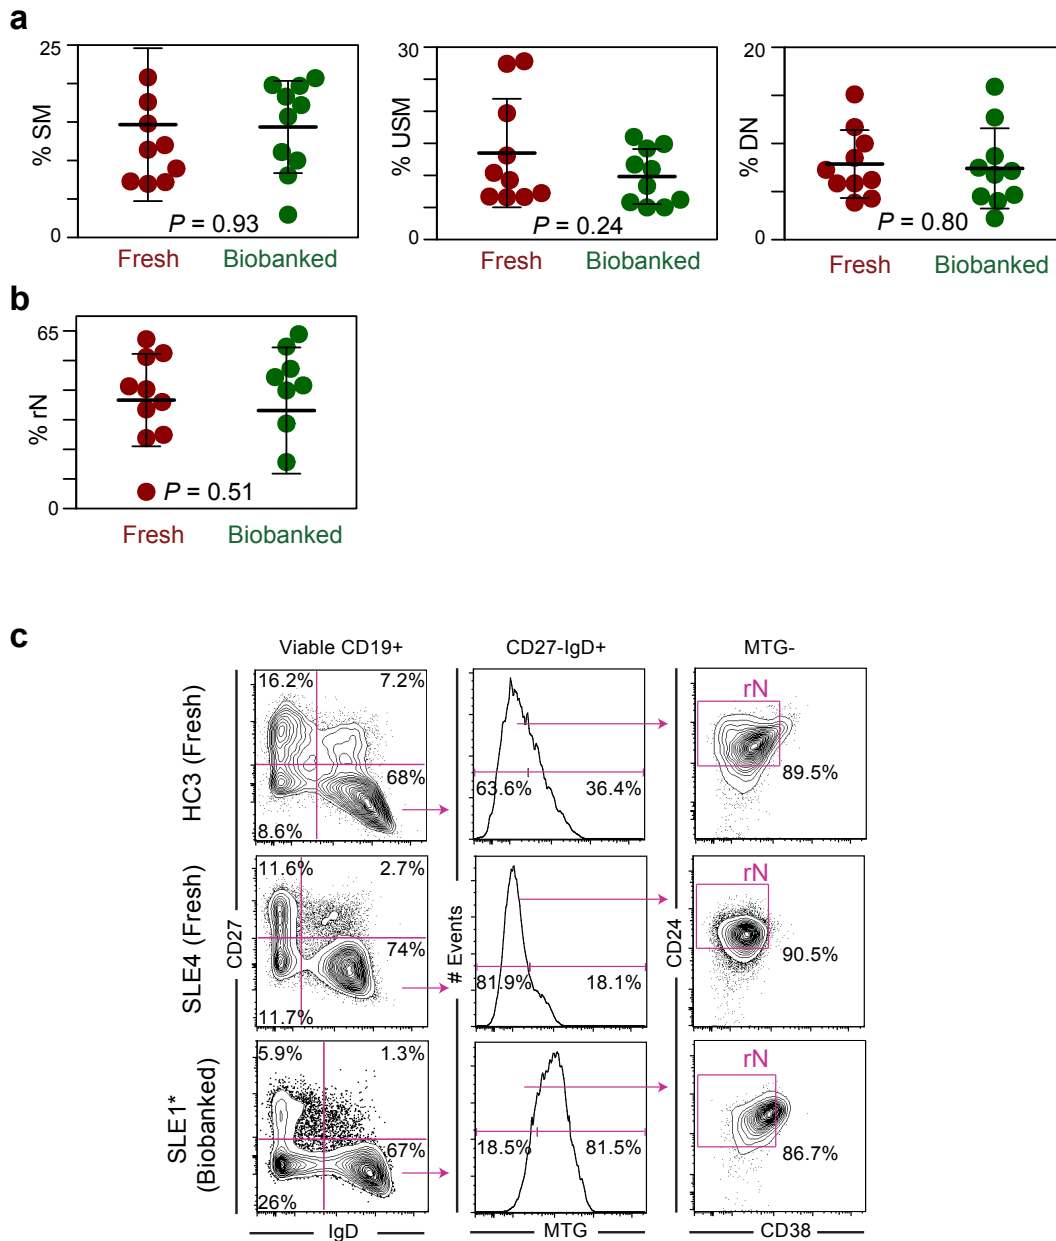

**Supplementary Figure 1. Flow cytometry data of B cell populations. (A)** Dot plots displaying the percentage of CD19+ B cell populations that are Switched Memory (SM), Unswitched Memory (USM), and Double Negative (DN) cells. Data is from 10 fresh and 10 biobanked samples. Statistical significance was tested by Student's *t*-test. **(B)** Dot plot representing the percentage of resting naïve (rN) B cells in 10 fresh and 10 biobanked samples. Statistical significance

was tested by Student's *t*-test. **(C)** Flow cytometry plots showing the gating strategies to isolate resting naïve B cells (rN) from HC and SLE subjects. The percentage of each population is indicated. A representative fresh HC (HC3) and biobanked SLE (SLE1\*) are shown along with the fresh SLE sample (SLE4).
